# Supplementary material
Source: PubMed Central journal article supplement (PMC11290988)
Supplement: NIHMS1989436-supplement-4.pdf [file NIHMS1989436-supplement-4.pdf]

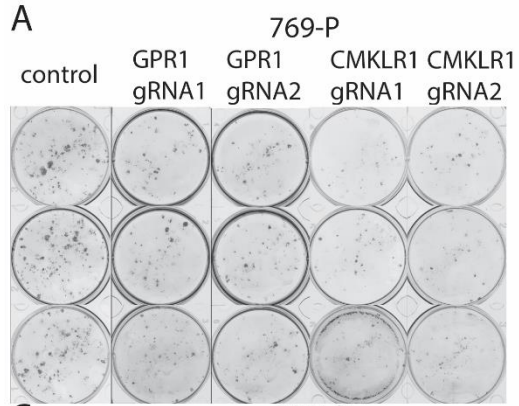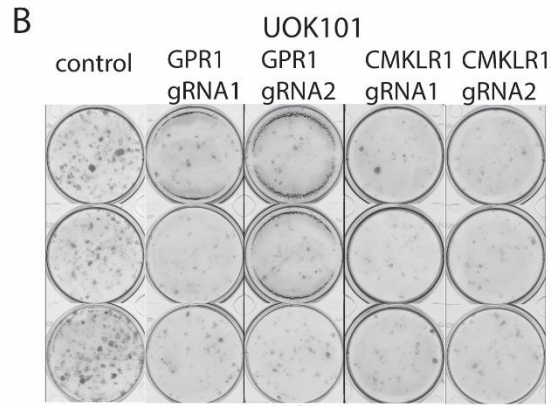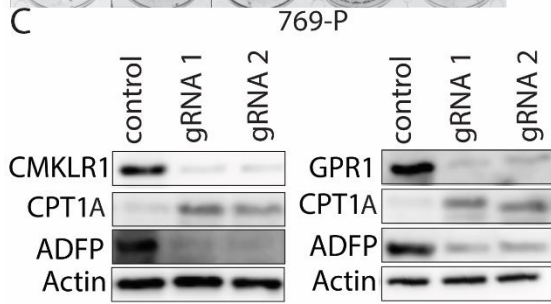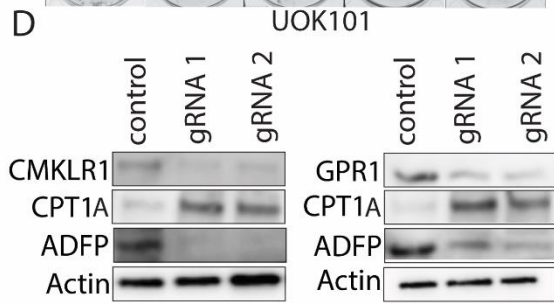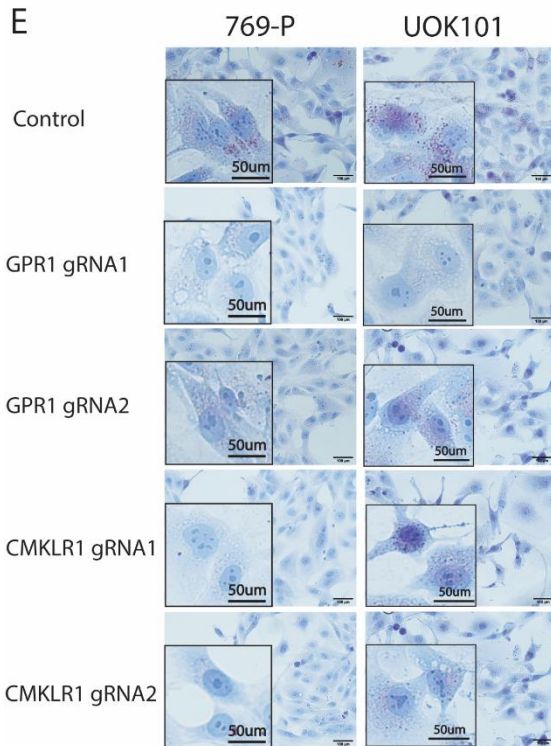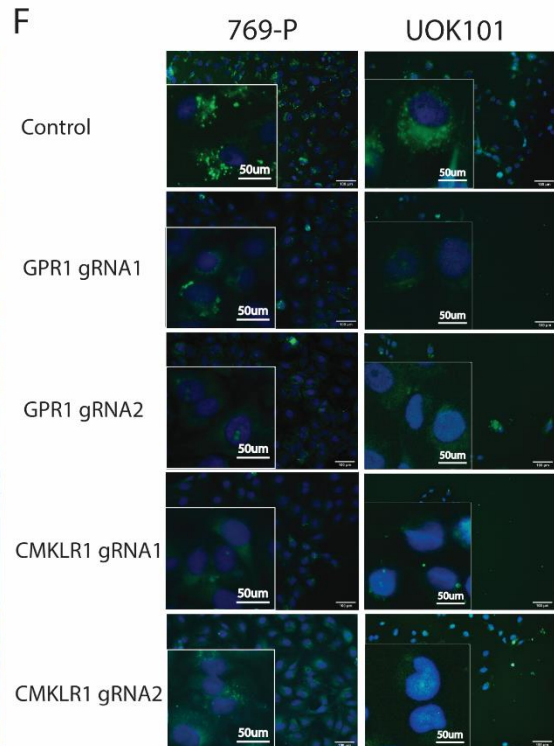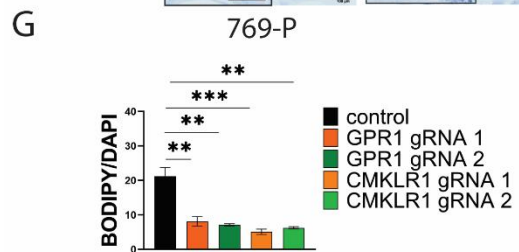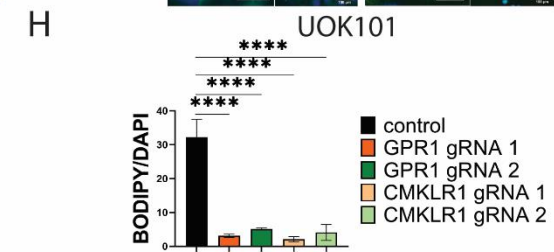

**Supplementary Figure 1. *GPR1* or *CMKLR1* knockout in ccRCC cells leads to elevated cell death and rewired lipid metabolism.**

A/B: Images of colony formation assays of 769-P and UOK101 cells with receptor knockouts.

C/D: Western blot probing CPT1A and ADFP/PLIN2 levels in 769-P and UOK101 cells with receptor knockouts.

E: ORO staining of 769-P and UOK101 cells with receptor knockouts.

F: BODIPY (493/503) staining of 769-P and UOK101 cells with receptor knockouts.

G/H: Quantification of BODIPY (493/503) staining of 769-P and UOK101 cells with receptor knockouts.
