# Supplementary material
Source: PubMed Central journal article supplement (PMC11290988)
Supplement: NIHMS1989436-supplement-5.pdf [file NIHMS1989436-supplement-5.pdf]

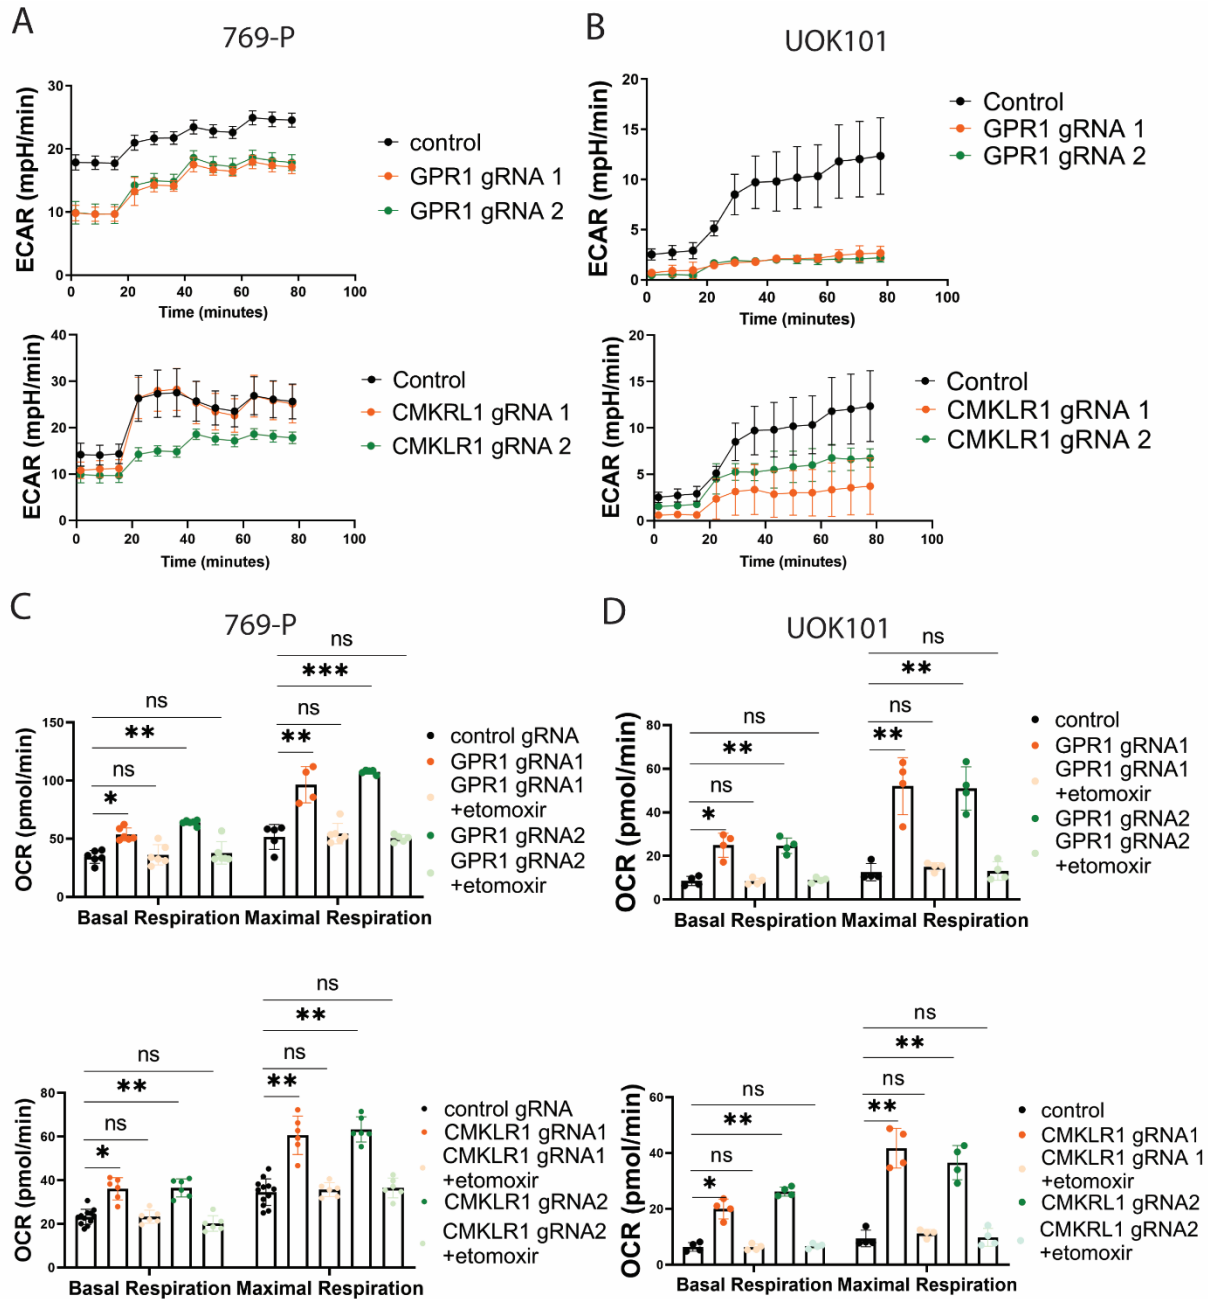

**Supplementary Figure 2. GPR1 or CMKLR1 knockout in ccRCC cells change the mitochondrial respiration rate, reversed by blocking lipid transporter CPT1A.**

A/B: Measurement of extracellular acidification rate as the result of receptor knockout.

C/D: Measurement of Oxygen Consumption rate when the knockout cells are pretreated with the CPT1A inhibitor, etomoxir, at 10  $\mu$ M overnight before the assay.
