# Supplementary material
Source: PubMed Central journal article supplement (PMC11290988)
Supplement: NIHMS1989436-supplement-7.pdf [file NIHMS1989436-supplement-7.pdf]

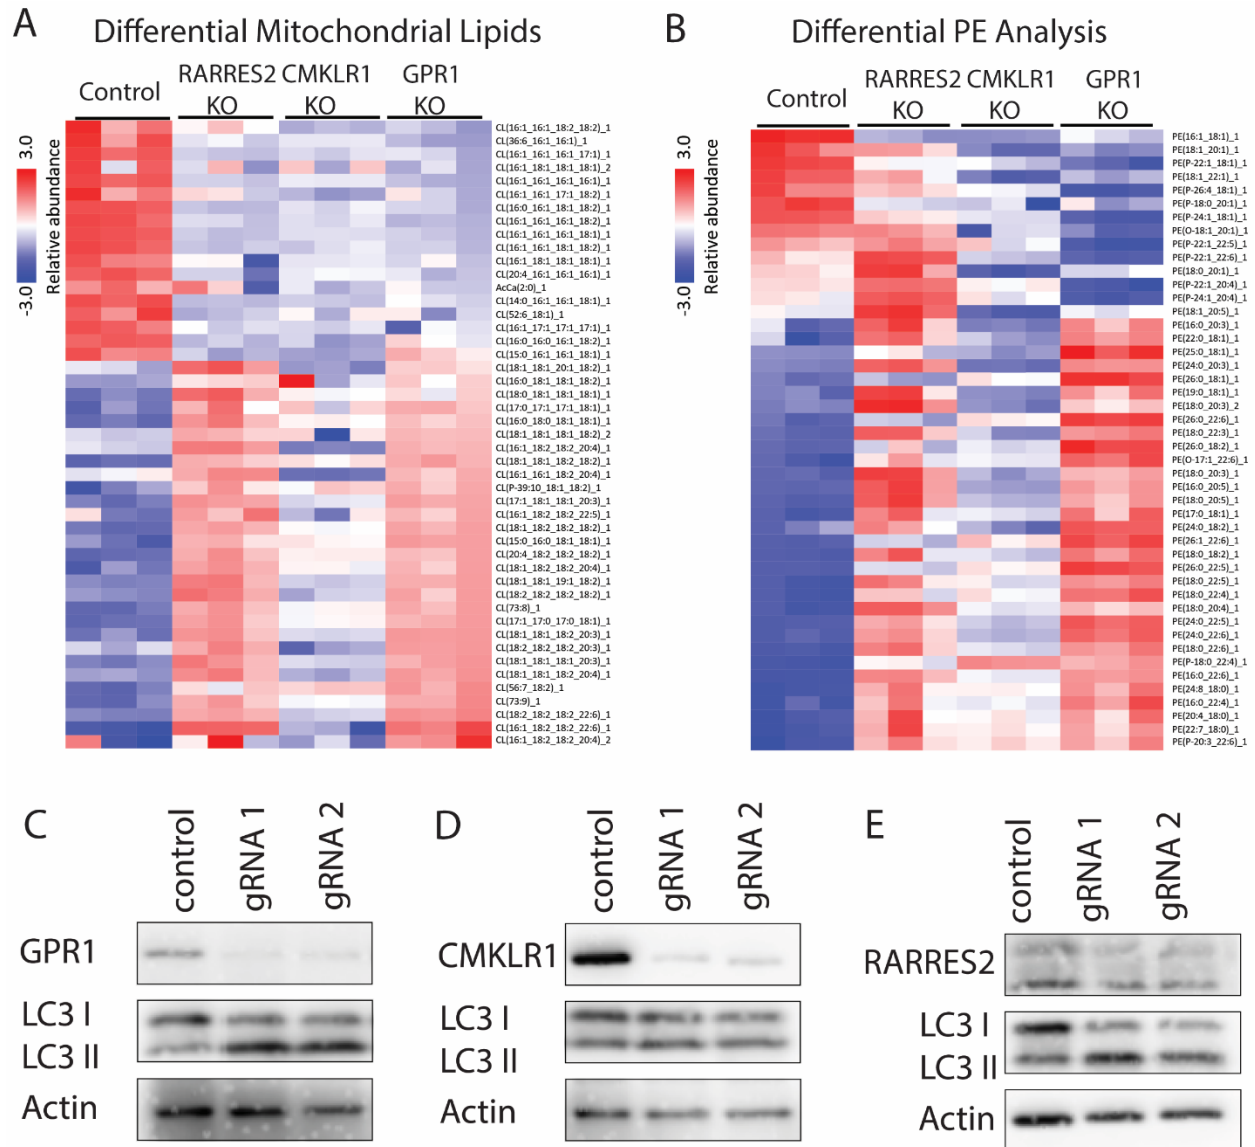

**Supplementary Figure 4. Untargeted lipidomics reveal the induction of autophagy uniquely through RARRES2/GPR1 axis.**

- A: Heatmap showing the differential mitochondrial lipid analysis.  
 B: Heatmap showing the differential PE lipid analysis.  
 C: LC3B staining of UOK101 cells with *GPR1* knockout.  
 D: LC3B staining of UOK101 cells with *CMKLR1* knockout.  
 E: LC3B staining of UOK101 cells with *RARRES2* knockout.
