# Supplementary material
Source: PubMed Central journal article supplement (PMC11290988)
Supplement: NIHMS1989436-supplement-8.pdf [file NIHMS1989436-supplement-8.pdf]

**A 769-P**

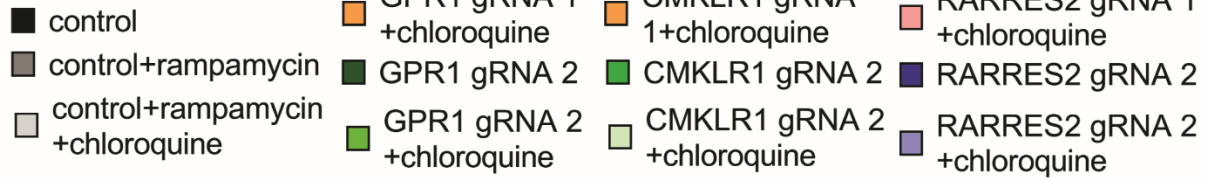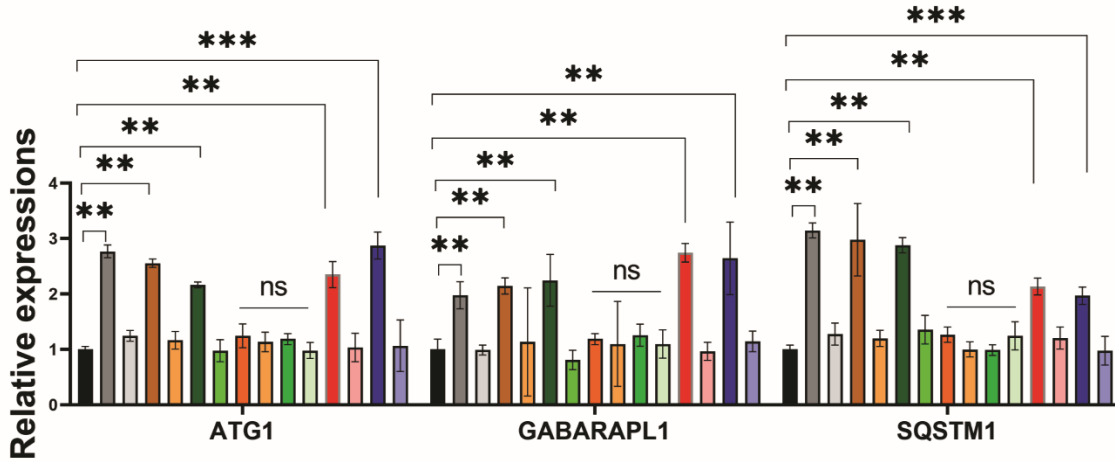

**B UOK101**

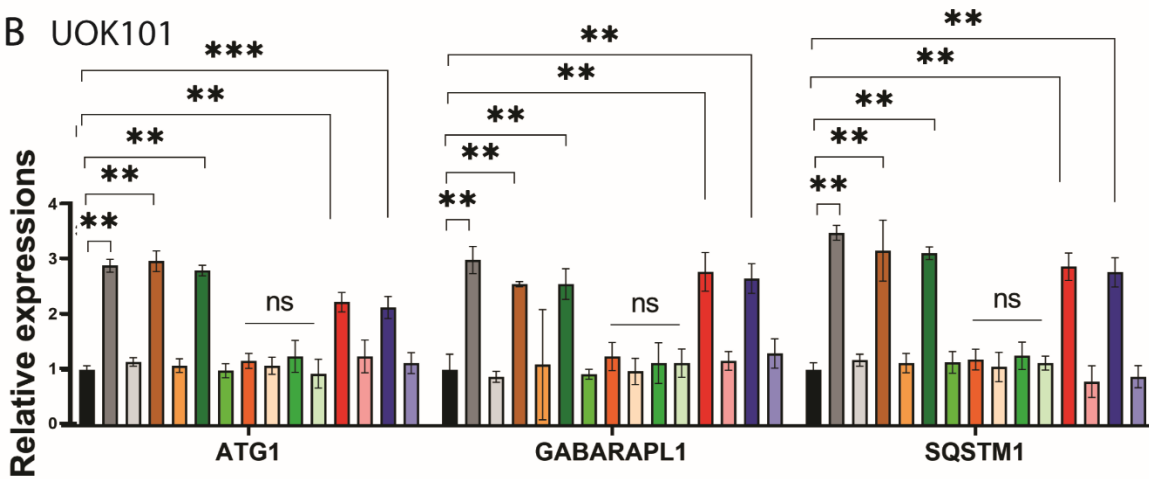

**C**

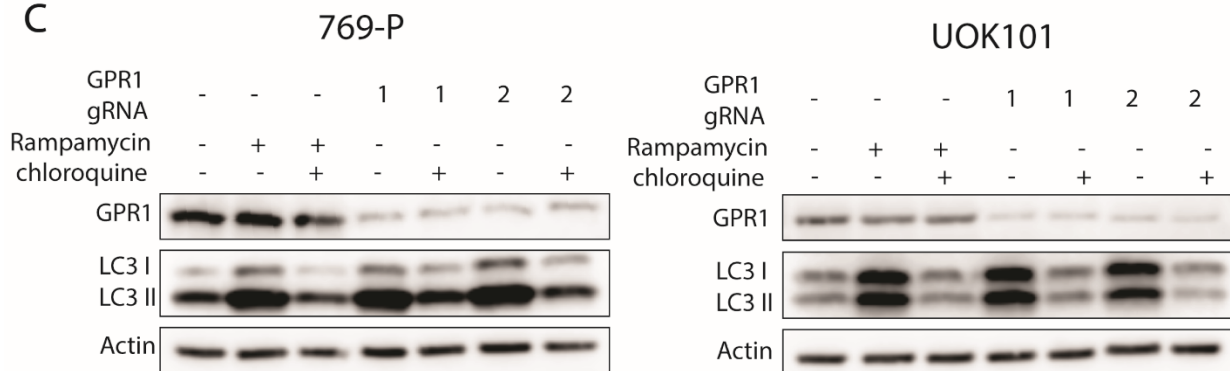

**Supplementary Figure 5. rtPCR and western blot verification of autophagy.**

A/B: qRT-PCR result of autophagy related genes after cells were treated with Ramapycin at 10  $\mu$ M or Chloroquine at 30  $\mu$ M overnight.

C: Western Probing of LC3I-II transition of CMKLR1 knockout cells while the control cell lines were exposed to Ramapycin at 10  $\mu$ M or both Ramapycin (10 $\mu$ M) and Chloroquine (30 $\mu$ M) simultaneously overnight.
