# Supplementary material
Source: PubMed Central journal article supplement (PMC11290988)
Supplement: NIHMS1989436-supplement-9.pdf [file NIHMS1989436-supplement-9.pdf]

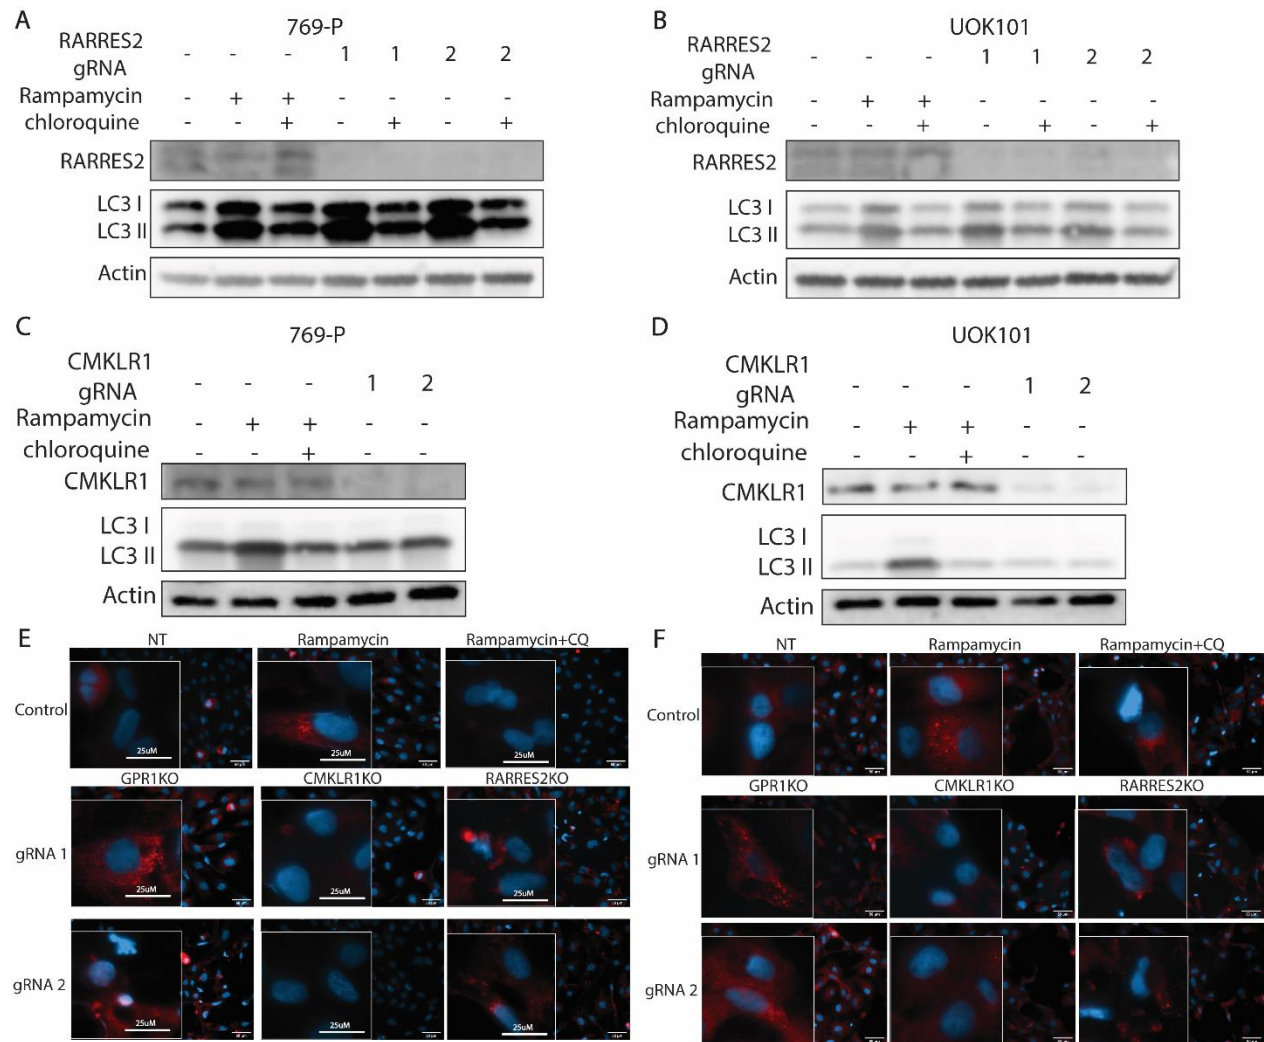

**Supplementary Figure 6. Western blotting and immunofluorescence staining to verify the induction of autophagy downstream of the RARRES2/GPR1 signaling axis.**

A/B: Western probing of LC3I-II transition in GPR1 knockout cells; control cells were exposed to Rampamycin at 10  $\mu$ M or both Rampamycin (10  $\mu$ M) and Chloroquine (30  $\mu$ M) simultaneously overnight.

C/D: Western probing of LC3I-II transition of RARRES2 knockout cells; control cells line were exposed to Rampamycin at 10  $\mu$ M or both Rampamycin (10uM) and Chloroquine (30  $\mu$ M) simultaneously overnight.

E/F: Immunofluorescence staining of LC3B in cells with either GPR1, CMKLR1, or RARRES2 knockout together with control cell lines that have been treated with Rampamycin at 10  $\mu$ M or both Rampamycin (10  $\mu$ M) and Chloroquine (30  $\mu$ M) simultaneously overnight.
