# Supplementary material
Source: PubMed Central journal article supplement (PMC11290988)
Supplement: NIHMS1989436-supplement-10.pdf [file NIHMS1989436-supplement-10.pdf]

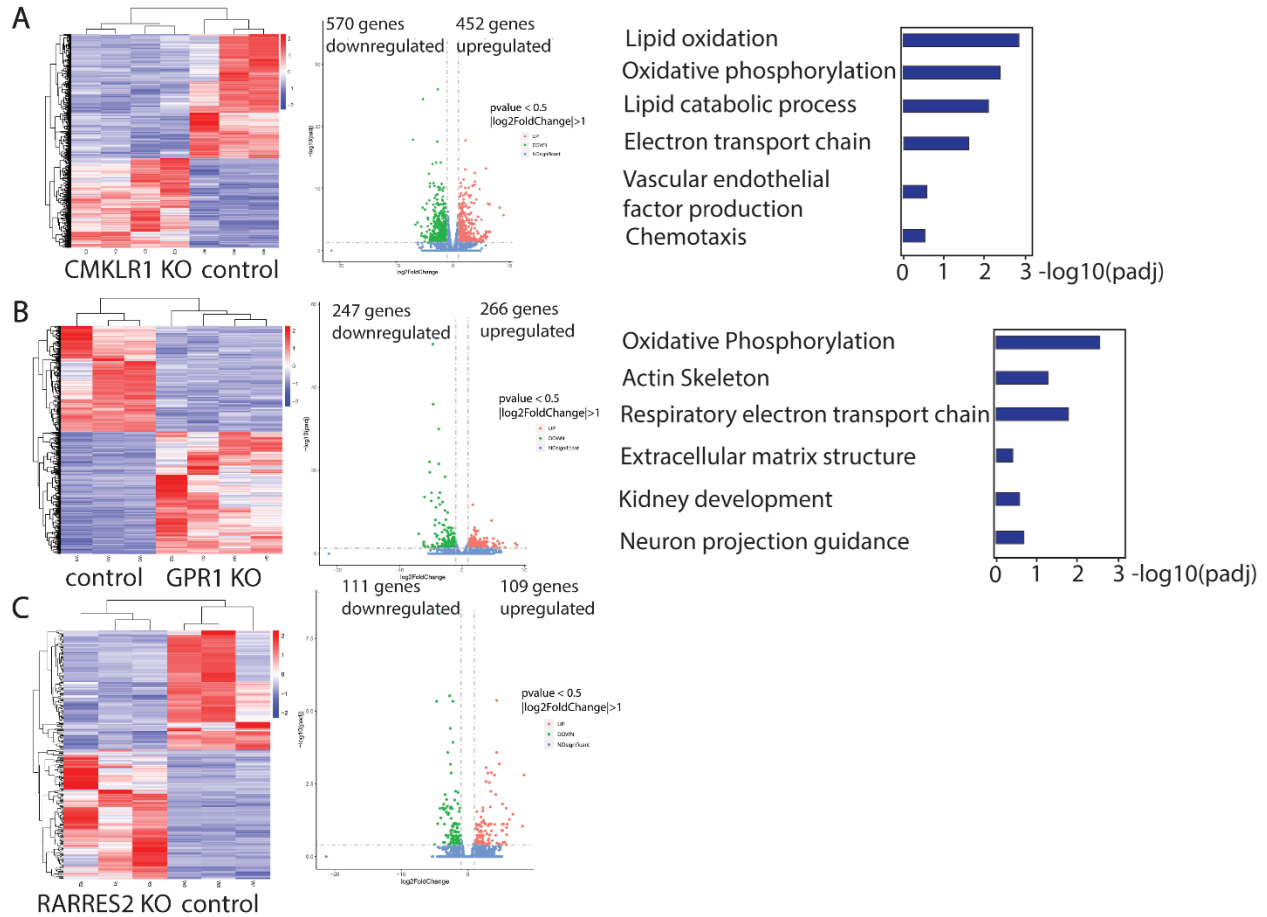

**Supplementary Figure 7. Bulk RNA-seq of ccRCC cells with GPR1, CMKLR1 or RARRES2 knockout.**

A-C: Heatmap and volcano plots of 769-P cells with *RARRES2*, *GPR1* and *CMKLR1* knockout.
