# Supplementary material
Source: PubMed Central journal article supplement (PMC11290988)
Supplement: NIHMS1989436-supplement-11.pdf [file NIHMS1989436-supplement-11.pdf]

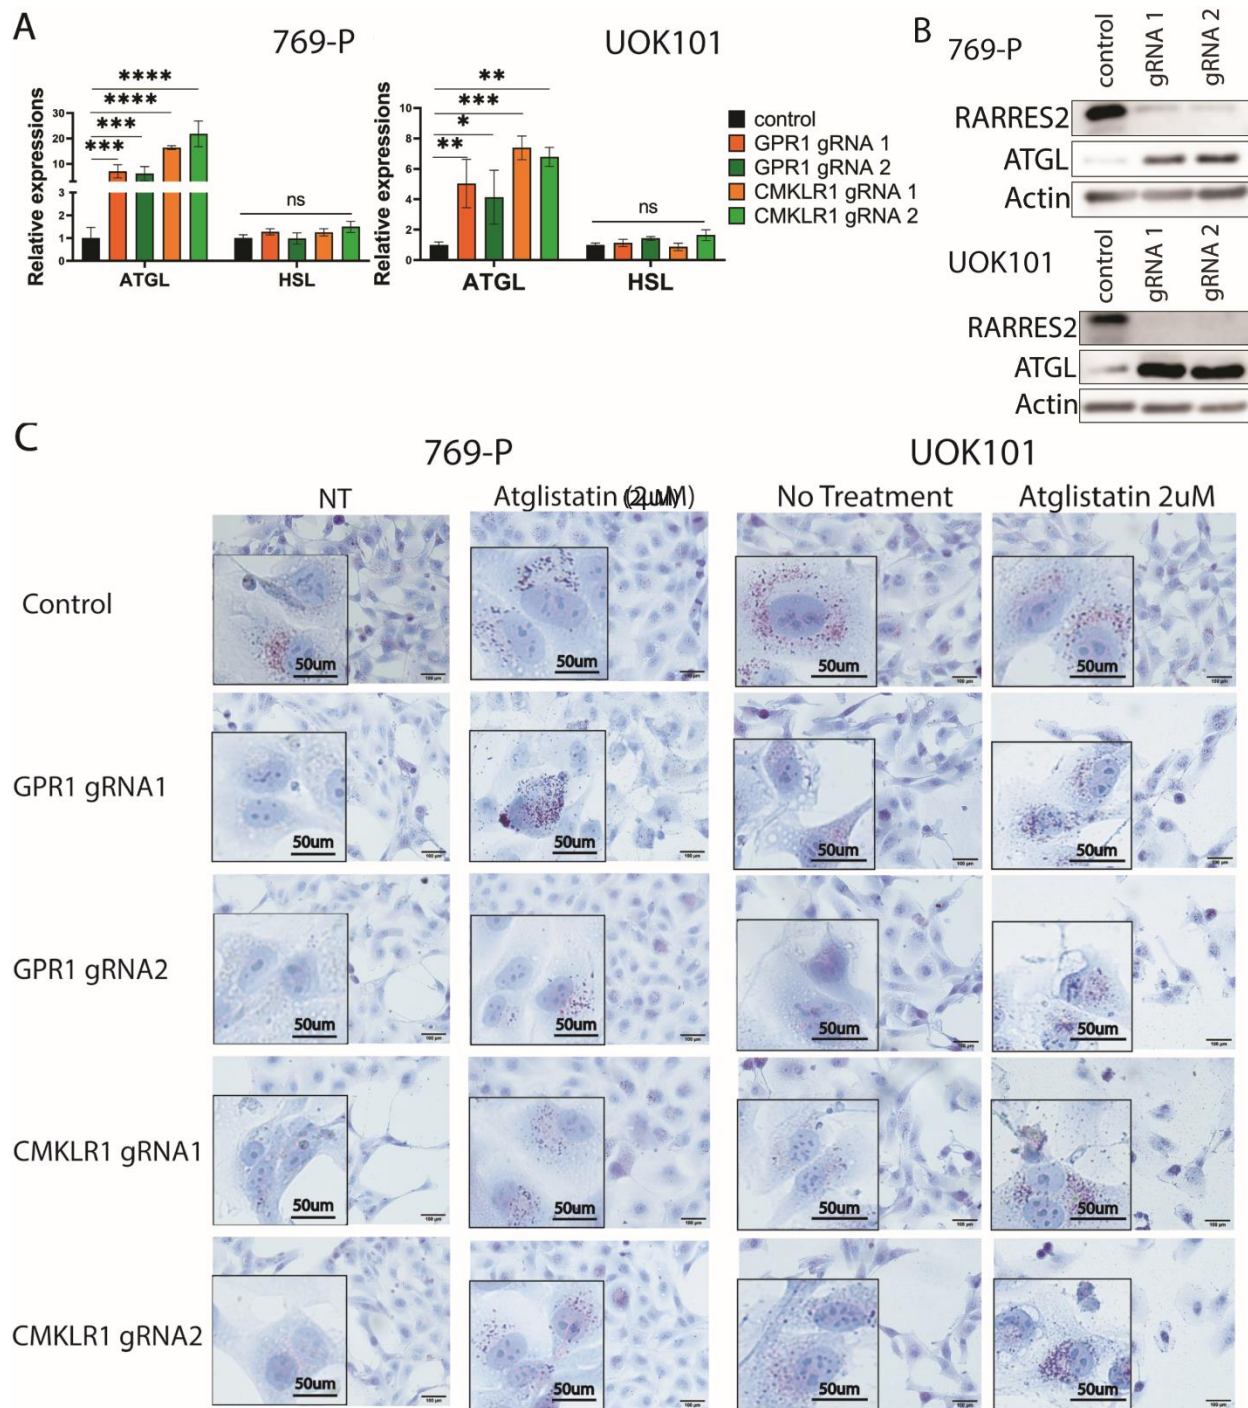

**Supplementary Figure 8. Abrogating RARRES2 signaling components leads to elevated ATGL, that is responsible for the changes in the lipid metabolism.**

A: mRNA level of HSL and ATGL in response to receptor knockout.

B: Western blot probing of ATGL in 769-P/UOK101 with RARRES2 knockout.

C: ORO staining of receptor knockout cells treated with 2  $\mu$ M of Atglistatin.
