# Supplementary material
Source: PubMed Central journal article supplement (PMC11290988)
Supplement: NIHMS1989436-supplement-12.pdf [file NIHMS1989436-supplement-12.pdf]

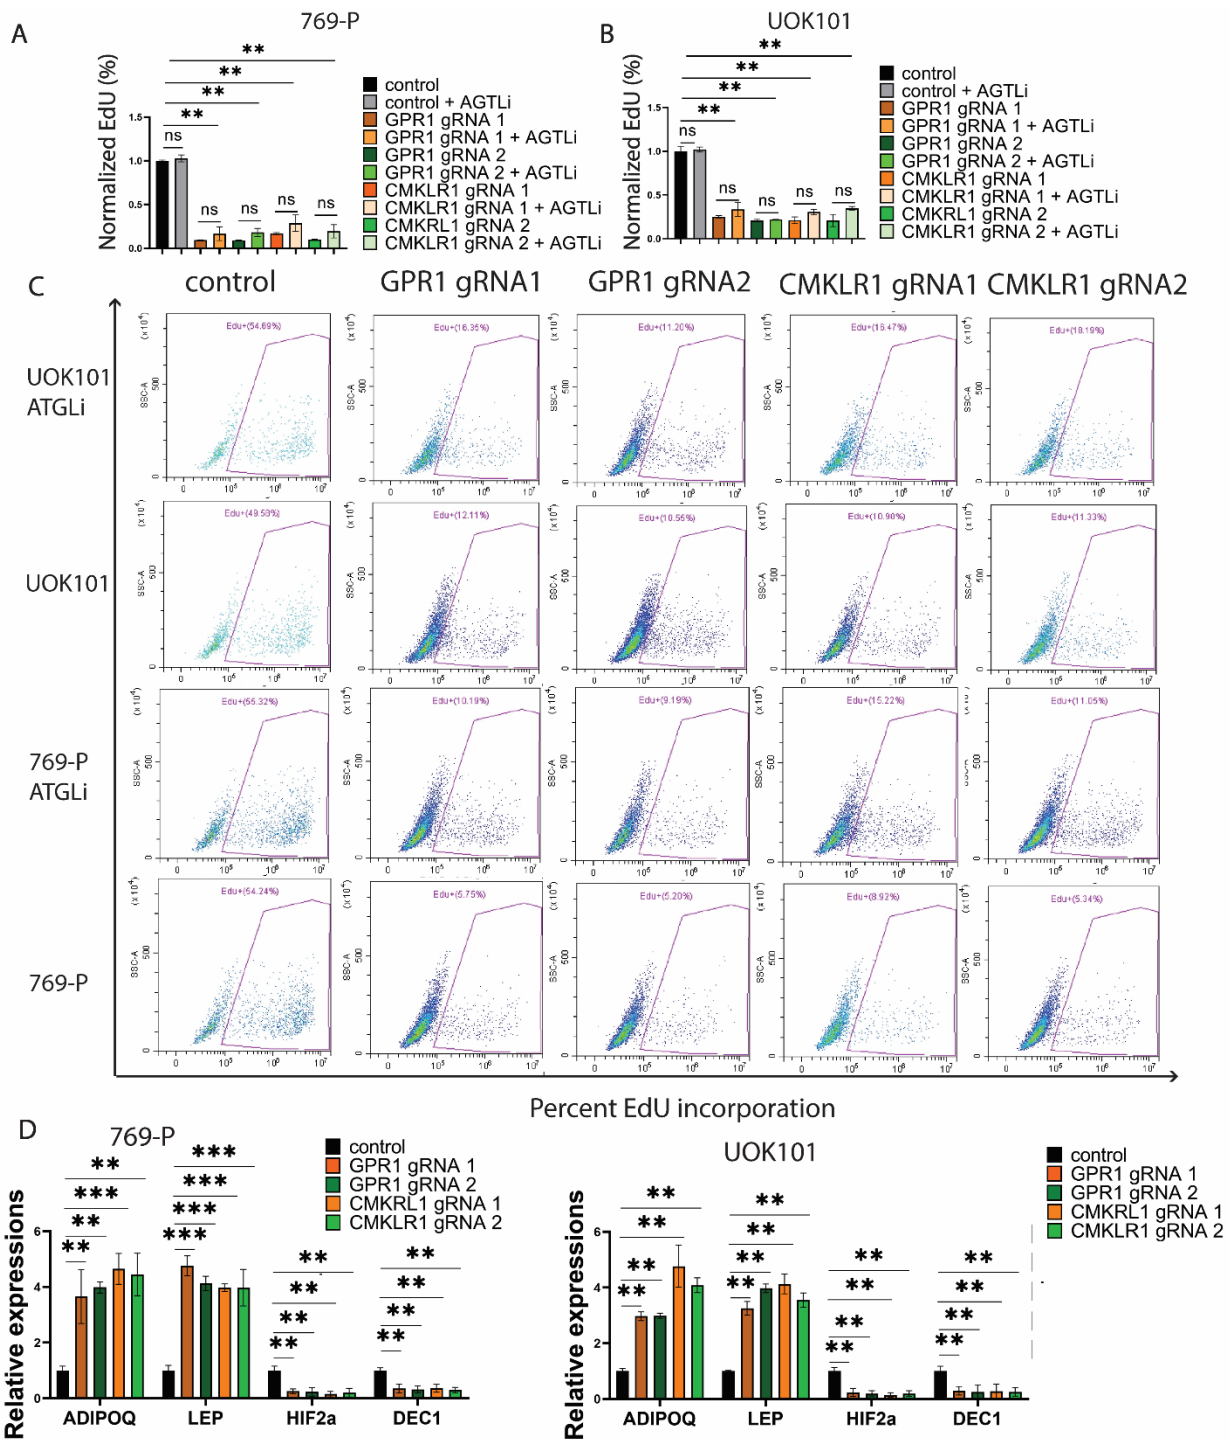

**Supplementary Figure 9. ATGL is elevated as a result of increased DEC1 signaling after receptor knockout, and its inhibition does not rescue the proliferation phenotype.**

A/B: Normalized EdU incorporation of receptor knockout cells treated with 2  $\mu$ M of Atglistatin.  
 C: Flow diagram showing the EdU incorporation of receptor knockout cells treated with 2  $\mu$ M Atglistatin.

D: qRT-PCR result showing PPAR $\gamma$  target genes (ADIPOQ and LEP), *DEC-1* and *HIF2 $\alpha$*  mRNA levels of cells with either GPR1 or CMKRL1 knocked out.
