# Supplementary material
Source: PubMed Central journal article supplement (PMC11290988)
Supplement: NIHMS1989436-supplement-13.pdf [file NIHMS1989436-supplement-13.pdf]

**Supplementary Figure 10. CMKLR1 knockout uniquely compromises the ability to uptake exogenous fatty acids.**

A/B: Quantification of ORO/BODIPY of UOK101 with receptor knockouts treated with exogenous fatty acids.

C/D: ORO staining of GPR1/CMKRL1 knockout ccRCC cells treated with oleic/linoleic acids with.

E/F: BODIPY staining of GPR1/CMKRL1 knockout ccRCC cells treated with oleic/linoleic acids with.
