# Supplementary material
Source: PubMed Central journal article supplement (PMC11290988)
Supplement: NIHMS1989436-supplement-14.pdf [file NIHMS1989436-supplement-14.pdf]

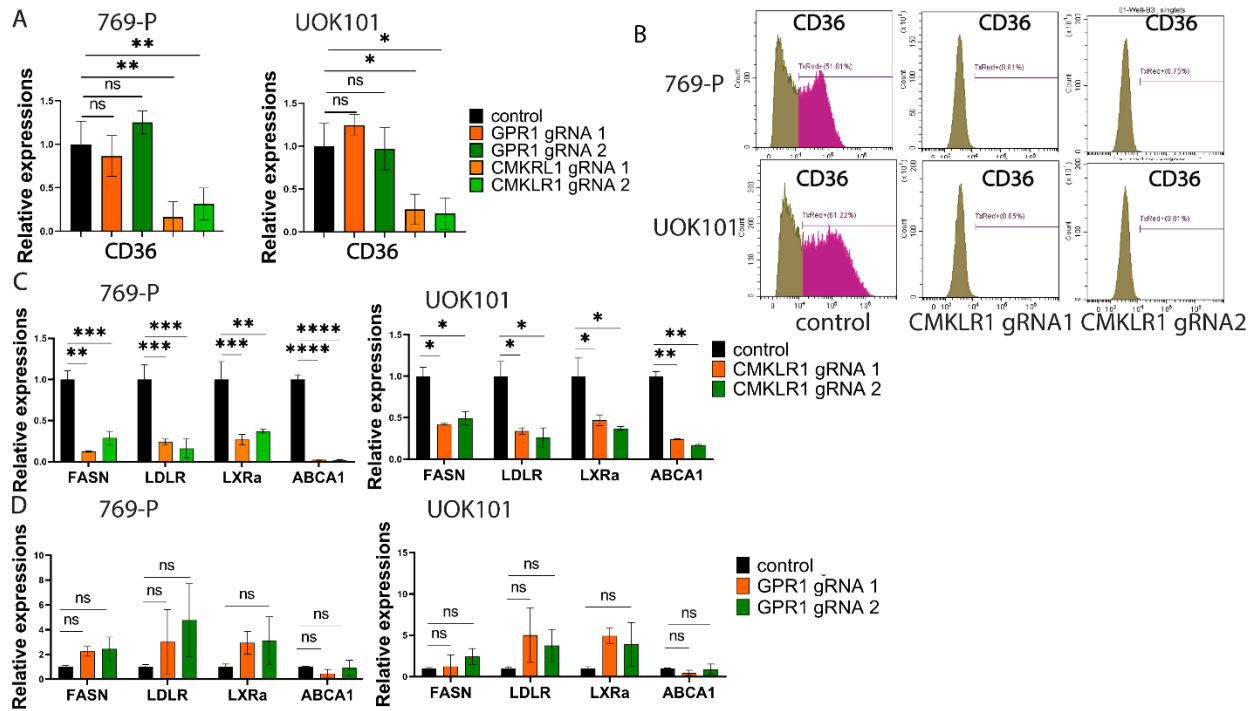

**Supplementary Figure 11. SREBP1c signaling is uniquely downstream of CMKRL1.**

A: qRT-PCR of CD36 from ccRCC cells with receptor knockout.

B: Flow cytometry staining of CD36 of ccRCC cells with CMKRL1 knockout.

C: qRT-PCR of SREBP target genes from ccRCC cells with CMKRL1 knockout.

D: qRT-PCR of SREBP target genes from ccRCC cells with GPR1 knockout.
