# Supplementary material
Source: PubMed Central journal article supplement (PMC11290988)
Supplement: NIHMS1989436-supplement-15.pdf [file NIHMS1989436-supplement-15.pdf]

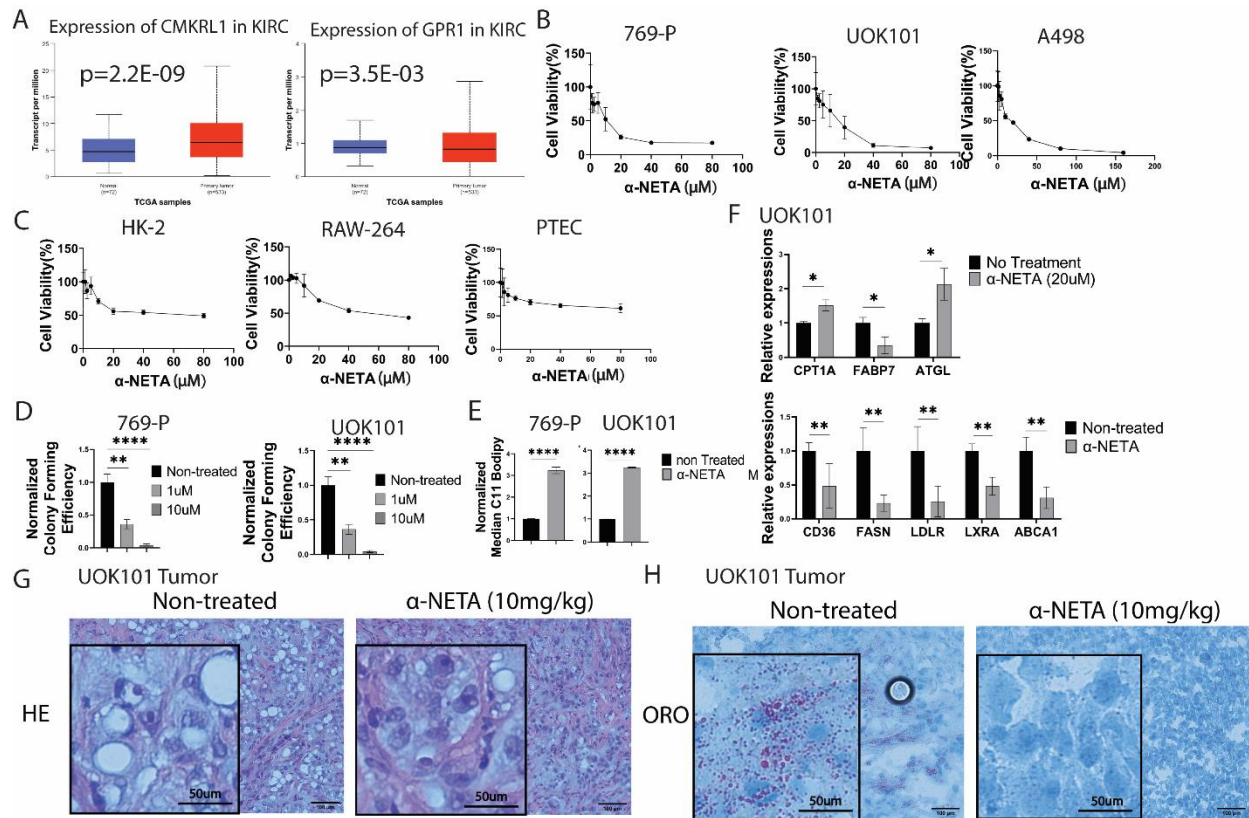

**Supplementary Figure 12.  $\alpha$ -NETA, a CMKRL1 antagonist, suppresses ccRCC growth *in vitro* and *in vivo*.**

A: TCGA data of tissue expression of CMKLR1 or GPR1 between kidney tumor and normal kidney.

B: MTT assay of 769-P, UOK101 and A498 cells treated with  $\alpha$ -NETA.

C: MTT assay of HK2, PTEC and RAW264 cells treated with  $\alpha$ -NETA.

D: Colony assay of 769-P, UOK101 pretreated with  $\alpha$ -NETA for 48hr.

E: Quantification of total fluorescence intensity calculated from C11 Bodipy staining of 769-P, UOK101 treated with  $\alpha$ -NETA for 48hr.

F: qRT-PCR of key CMKRL1 regulatory genes in UOK101 treated with  $\alpha$ -NETA for 48hr.

G: Hematoxylin and eosin staining of UOK101 tumors treated with  $\alpha$ -NETA.

H: ORO staining of UOK101 tumors treated with  $\alpha$ -NETA.
