# Supplementary material
Source: PubMed Central journal article supplement (PMC11290988)
Supplement: NIHMS1989436-supplement-16.pdf [file NIHMS1989436-supplement-16.pdf]

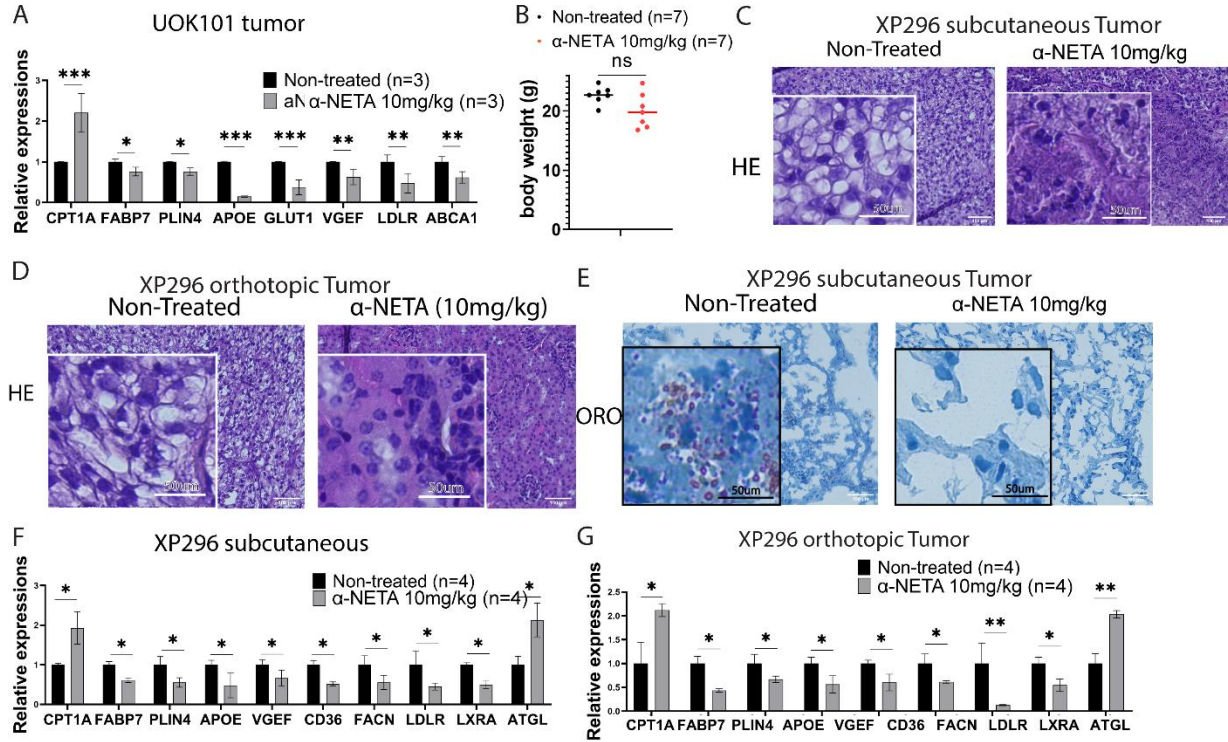

**Supplementary Figure 13. α-NETA suppresses growth of patient derived xenografts of ccRCC.**

- A: qRT-PCR of key CMKRL1 regulatory genes in UOK101 treated with α-NETA for 48hr.
- B: Mouse body weights measured at the terminal point of XP296 subcutaneous tumor growth assay.
- C: Hematoxylin and eosin staining of subcutaneous XP296 tumors treated with α-NETA.
- D: Hematoxylin and eosin staining of orthotopic XP296 tumors treated with α-NETA.
- E: ORO staining of subcutaneous XP296 tumors treated with α-NETA.
- F: Gene expression analysis of subcutaneous XP296 tumors treated with α-NETA.
- G: Gene expression analysis of orthotopic XP296 tumors treated with α-NETA.
